# Supplementary material for: Precision of the Indirect Bonding Method Using CAD/CAM Technology and CBCT Image Superimposition
Source: Research Square preprint supplement (doi:10.21203/rs.3.rs-6976645/v1), 2025-07-22
Supplement: Supplementary file 1 [file 40fe75713e90725f37639fa8.docx]

**Highlights**

- The study found that bracket positioning in the horizontal and vertical dimensions remained below the clinically acceptable limit of 0.5 mm when using CAD/CAM technology, indicating a high level of precision in these planes.
- While CBCT superimposition provided valuable root visualization, angular deviations for twelve dental elements did not show a statistically significant difference with the accepted clinical limit of 3 degrees, suggesting that further refinement is needed to improve angular precision.
- The Wilcoxon paired sample test revealed statistically significant differences in bracket positioning across all the vertical and horizontal dimensions, confirming that the orthodontist maintained their bonding pattern.
- Although CBCT provided additional data for root positioning, its overall influence on bracket precision, particularly in the angular dimension, was uncertain. The findings suggest further research is needed to determine whether CBCT consistently enhances or negatively impacts bonding precision.
